# Supplementary material for: Human Mitochondrial Ribosomal RNA Modification-Based Classification Contributes to Discriminate the Prognosis and Immunotherapy Response of Glioma Patients
Source: Front Immunol. 2021 Sep 9;12:722479. doi: 10.3389/fimmu.2021.722479 (PMC8458820; doi:10.3389/fimmu.2021.722479)
Supplement: Supplementary file 13 [file Table_3.xlsx]

## Sheet: S3
Supplementary Table S3. The total different enrichment KEGG pathways between RM1 subtype and RM2 subtype.
id	logFC	AveExpr	t	P.Value	adj.P.Val	B
KEGG_OLFACTORY_TRANSDUCTION	0.150792	0.110083	26.3094	1.69103e-102	3.12841e-100	223.224
KEGG_MISMATCH_REPAIR	-0.317125	-0.0611526	-23.2347	5.3161e-86	9.78162e-84	185.37
KEGG_DNA_REPLICATION	-0.305387	-0.0540353	-19.3352	2.59523e-65	4.74926e-63	137.906
KEGG_N_GLYCAN_BIOSYNTHESIS	-0.211949	-0.0609329	-19.0474	8.18837e-64	1.49028e-61	134.468
KEGG_PYRIMIDINE_METABOLISM	-0.167522	-0.0565167	-18.4464	1.0592e-60	1.91715e-58	127.331
KEGG_P53_SIGNALING_PATHWAY	-0.181908	-0.0546205	-18.0787	8.23255e-59	1.48186e-56	122.995
KEGG_HOMOLOGOUS_RECOMBINATION	-0.244902	-0.0524809	-17.619	1.83149e-56	3.27837e-54	117.613
KEGG_CELL_CYCLE	-0.204211	-0.0522515	-17.08	9.76688e-54	1.7385e-51	111.361
KEGG_NUCLEOTIDE_EXCISION_REPAIR	-0.183018	-0.0587419	-16.5164	6.45934e-51	1.1433e-48	104.895
KEGG_SYSTEMIC_LUPUS_ERYTHEMATOSUS	-0.212235	-0.0313476	-16.2696	1.08059e-49	1.90183e-47	102.091
KEGG_PURINE_METABOLISM	-0.10081	-0.0505127	-16.0682	1.06512e-48	1.86397e-46	99.8134
KEGG_PROTEASOME	-0.229119	-0.0540758	-15.2069	1.65137e-44	2.87339e-42	90.2114
KEGG_BASE_EXCISION_REPAIR	-0.19478	-0.0550828	-15.0635	8.04892e-44	1.39246e-41	88.6355
KEGG_AMINO_SUGAR_AND_NUCLEOTIDE_SUGAR_METABOLISM	-0.183065	-0.0600449	-14.8499	8.41447e-43	1.44729e-40	86.3006
KEGG_ECM_RECEPTOR_INTERACTION	-0.193365	-0.0559362	-14.3404	2.13213e-40	3.64595e-38	80.7953
KEGG_BLADDER_CANCER	-0.130833	-0.0525613	-14.2699	4.55363e-40	7.74117e-38	80.0406
KEGG_GLYCOSAMINOGLYCAN_DEGRADATION	-0.196032	-0.0476833	-14.2064	9.00725e-40	1.52223e-37	79.3623
KEGG_GLUTATHIONE_METABOLISM	-0.162854	-0.0387505	-14.1919	1.05177e-39	1.76697e-37	79.2082
KEGG_PATHOGENIC_ESCHERICHIA_COLI_INFECTION	-0.152752	-0.0477971	-13.0528	1.63679e-34	2.73343e-32	67.3241
KEGG_SMALL_CELL_LUNG_CANCER	-0.12242	-0.0531814	-12.7713	2.88818e-33	4.79437e-31	64.4722
KEGG_GLYCOSYLPHOSPHATIDYLINOSITOL_GPI_ANCHOR_BIOSYNTHESIS	-0.153527	-0.0579174	-12.7636	3.1225e-33	5.15213e-31	64.3947
KEGG_RIBOFLAVIN_METABOLISM	-0.135977	-0.0475821	-12.5831	1.93104e-32	3.1669e-30	62.5848
KEGG_PROTEIN_EXPORT	-0.173179	-0.0566201	-12.1299	1.74922e-30	2.85122e-28	58.1099
KEGG_NICOTINATE_AND_NICOTINAMIDE_METABOLISM	-0.132378	-0.0559363	-11.6719	1.50262e-28	2.43425e-26	53.6898
KEGG_GALACTOSE_METABOLISM	-0.134172	-0.0392982	-11.562	4.30608e-28	6.9328e-26	52.6451
KEGG_GLYCOSAMINOGLYCAN_BIOSYNTHESIS_KERATAN_SULFATE	-0.187883	-0.0483266	-11.2804	6.20998e-27	9.93597e-25	49.9976
KEGG_ONE_CARBON_POOL_BY_FOLATE	-0.127438	-0.0508984	-10.884	2.47609e-25	3.93698e-23	46.3429
KEGG_TASTE_TRANSDUCTION	0.103776	0.00152942	10.8463	3.50018e-25	5.53029e-23	45.9998
KEGG_LONG_TERM_DEPRESSION	0.107802	-0.0241907	10.7796	6.43785e-25	1.01074e-22	45.3957
KEGG_FOCAL_ADHESION	-0.109815	-0.0478614	-10.3526	3.01474e-23	4.703e-21	41.5844
KEGG_OTHER_GLYCAN_DEGRADATION	-0.169073	-0.0495126	-10.2785	5.81569e-23	9.01432e-21	40.9336
KEGG_STEROID_HORMONE_BIOSYNTHESIS	0.0862583	0.0222238	10.0453	4.49713e-22	6.92558e-20	38.9082
KEGG_RNA_POLYMERASE	-0.131858	-0.0535121	-9.95673	9.69682e-22	1.48361e-19	38.1476
KEGG_PRIMARY_IMMUNODEFICIENCY	-0.172323	-0.0470255	-9.72378	7.14984e-21	1.08678e-18	36.1705
KEGG_AMINOACYL_TRNA_BIOSYNTHESIS	-0.126343	-0.0541827	-9.62752	1.6166e-20	2.44106e-18	35.3634
KEGG_PANTOTHENATE_AND_COA_BIOSYNTHESIS	-0.121138	-0.0512165	-9.61508	1.79554e-20	2.69331e-18	35.2596
KEGG_APOPTOSIS	-0.102464	-0.0470303	-9.38334	1.24709e-19	1.85817e-17	33.3429
KEGG_COMPLEMENT_AND_COAGULATION_CASCADES	-0.138111	-0.0226894	-9.36931	1.40081e-19	2.0732e-17	33.228
KEGG_LYSOSOME	-0.118847	-0.0444821	-9.34731	1.6805e-19	2.47034e-17	33.0481
KEGG_FOLATE_BIOSYNTHESIS	-0.136534	-0.0331882	-9.30706	2.34273e-19	3.42039e-17	32.7196
KEGG_PHOSPHATIDYLINOSITOL_SIGNALING_SYSTEM	0.106455	-0.0222508	9.11495	1.12728e-18	1.63456e-16	31.167
KEGG_LEISHMANIA_INFECTION	-0.162102	-0.0302792	-9.10511	1.22089e-18	1.75809e-16	31.0881
KEGG_LEUKOCYTE_TRANSENDOTHELIAL_MIGRATION	-0.112963	-0.0360828	-9.05309	1.85994e-18	2.65971e-16	30.6723
KEGG_GRAFT_VERSUS_HOST_DISEASE	-0.192044	-0.0210166	-8.98524	3.21193e-18	4.56094e-16	30.1326
KEGG_ANTIGEN_PROCESSING_AND_PRESENTATION	-0.130032	-0.01822	-8.98187	3.30008e-18	4.65311e-16	30.1058
KEGG_INTESTINAL_IMMUNE_NETWORK_FOR_IGA_PRODUCTION	-0.172486	-0.0290689	-8.91276	5.73819e-18	8.03347e-16	29.5595
KEGG_ALLOGRAFT_REJECTION	-0.194065	-0.020702	-8.89631	6.54263e-18	9.09426e-16	29.4299
KEGG_PENTOSE_PHOSPHATE_PATHWAY	-0.097707	-0.0416814	-8.74174	2.22501e-17	3.07051e-15	28.2215
KEGG_LONG_TERM_POTENTIATION	0.107177	-0.030995	8.70636	2.93766e-17	4.02459e-15	27.9472
KEGG_HEMATOPOIETIC_CELL_LINEAGE	-0.135444	-0.0353444	-8.57464	8.20509e-17	1.11589e-14	26.9336
KEGG_CYTOKINE_CYTOKINE_RECEPTOR_INTERACTION	-0.110549	-0.0285389	-8.20733	1.35035e-15	1.82297e-13	24.1718
KEGG_VIRAL_MYOCARDITIS	-0.11589	-0.0323825	-8.19964	1.43052e-15	1.9169e-13	24.115
KEGG_CELL_ADHESION_MOLECULES_CAMS	-0.1126	-0.0381159	-8.198	1.44813e-15	1.92602e-13	24.1029
KEGG_AUTOIMMUNE_THYROID_DISEASE	-0.143575	-0.00686266	-8.14603	2.13528e-15	2.81856e-13	23.7203
KEGG_TYPE_I_DIABETES_MELLITUS	-0.148212	-0.0221046	-8.11703	2.64973e-15	3.47115e-13	23.5076
KEGG_WNT_SIGNALING_PATHWAY	0.0708676	-0.0321166	8.09911	3.0268e-15	3.93484e-13	23.3765
KEGG_RNA_DEGRADATION	-0.100985	-0.0452445	-7.95061	9.03857e-15	1.16598e-12	22.299
KEGG_INOSITOL_PHOSPHATE_METABOLISM	0.0841711	-0.0271677	7.76502	3.46875e-14	4.44e-12	20.9753
KEGG_PANCREATIC_CANCER	-0.0841802	-0.0430198	-7.73935	4.16972e-14	5.29555e-12	20.7942
KEGG_BUTANOATE_METABOLISM	0.091647	-0.026939	7.73585	4.27542e-14	5.38703e-12	20.7696
KEGG_GLYCOSPHINGOLIPID_BIOSYNTHESIS_GLOBO_SERIES	-0.110566	-0.0490184	-7.71105	5.10497e-14	6.38121e-12	20.5951
KEGG_CYTOSOLIC_DNA_SENSING_PATHWAY	-0.0871852	-0.0198791	-7.60691	1.06943e-13	1.32609e-11	19.8678
KEGG_ASCORBATE_AND_ALDARATE_METABOLISM	0.0741183	0.0668116	7.5419	1.69007e-13	2.07879e-11	19.4179
KEGG_ASTHMA	-0.147598	-0.0141633	-7.25223	1.24968e-12	1.5246e-10	17.4523
KEGG_JAK_STAT_SIGNALING_PATHWAY	-0.0725791	-0.0200937	-7.12929	2.86615e-12	3.46804e-10	16.6376
KEGG_STARCH_AND_SUCROSE_METABOLISM	-0.0660691	0.00400285	-7.08841	3.7675e-12	4.521e-10	16.3694
KEGG_UBIQUITIN_MEDIATED_PROTEOLYSIS	-0.0632003	-0.0445609	-7.06478	4.41007e-12	5.24799e-10	16.2149
KEGG_TOLL_LIKE_RECEPTOR_SIGNALING_PATHWAY	-0.0851454	-0.0275134	-6.93622	1.03109e-11	1.21669e-09	15.3821
KEGG_BASAL_TRANSCRIPTION_FACTORS	-0.0829762	-0.0505939	-6.87467	1.5414e-11	1.80343e-09	14.9881
KEGG_PROPANOATE_METABOLISM	0.0925423	-0.025961	6.84134	1.91408e-11	2.22033e-09	14.7759
KEGG_PATHWAYS_IN_CANCER	-0.0534544	-0.039576	-6.82305	2.15477e-11	2.47799e-09	14.6599
KEGG_NATURAL_KILLER_CELL_MEDIATED_CYTOTOXICITY	-0.0759918	-0.0256997	-6.57192	1.0673e-10	1.21673e-08	13.0937
KEGG_MATURITY_ONSET_DIABETES_OF_THE_YOUNG	-0.0701627	-0.0180351	-6.45044	2.27339e-10	2.56893e-08	12.3543
KEGG_GLYCOSPHINGOLIPID_BIOSYNTHESIS_GANGLIO_SERIES	-0.0952934	-0.056947	-6.40225	3.05879e-10	3.42585e-08	12.0644
KEGG_REGULATION_OF_ACTIN_CYTOSKELETON	-0.0628277	-0.0326539	-6.34011	4.47231e-10	4.96427e-08	11.6933
KEGG_DORSO_VENTRAL_AXIS_FORMATION	0.0775128	-0.0210662	6.33279	4.67598e-10	5.14358e-08	11.6498
KEGG_BETA_ALANINE_METABOLISM	0.0698909	-0.034151	6.31519	5.20387e-10	5.67222e-08	11.5453
KEGG_GLYCOLYSIS_GLUCONEOGENESIS	-0.0704765	-0.0285421	-6.26364	7.10766e-10	7.67627e-08	11.241
KEGG_T_CELL_RECEPTOR_SIGNALING_PATHWAY	-0.067485	-0.0413058	-6.17653	1.19789e-09	1.28175e-07	10.7316
KEGG_TYROSINE_METABOLISM	-0.0655596	-0.0385897	-6.0441	2.61808e-09	2.77516e-07	9.96933
KEGG_RIG_I_LIKE_RECEPTOR_SIGNALING_PATHWAY	-0.0507569	-0.0218405	-6.04319	2.63213e-09	2.77516e-07	9.96412
KEGG_PHENYLALANINE_METABOLISM	-0.0844135	-0.037028	-5.99101	3.56768e-09	3.71039e-07	9.66782
KEGG_PEROXISOME	-0.0661704	-0.0448316	-5.94969	4.53204e-09	4.66801e-07	9.43481
KEGG_GLYCEROLIPID_METABOLISM	0.0451488	-0.0246536	5.88937	6.41033e-09	6.53853e-07	9.09728
KEGG_EPITHELIAL_CELL_SIGNALING_IN_HELICOBACTER_PYLORI_INFECTION	-0.0505174	-0.0442898	-5.84485	8.26443e-09	8.34707e-07	8.85008
KEGG_PROGESTERONE_MEDIATED_OOCYTE_MATURATION	-0.0479597	-0.0455218	-5.60041	3.23842e-08	3.23842e-06	7.52292
KEGG_MELANOGENESIS	0.050346	-0.0332117	5.52916	4.77739e-08	4.72962e-06	7.14566
KEGG_HYPERTROPHIC_CARDIOMYOPATHY_HCM	-0.051101	-0.0488067	-5.26569	1.93897e-07	1.90019e-05	5.7888
KEGG_TAURINE_AND_HYPOTAURINE_METABOLISM	0.0705191	-0.0303143	5.22014	2.45584e-07	2.38216e-05	5.56031
KEGG_TYPE_II_DIABETES_MELLITUS	0.0594959	-0.0297019	5.19096	2.85442e-07	2.74024e-05	5.41495
KEGG_TERPENOID_BACKBONE_BIOSYNTHESIS	0.0888865	-0.0287798	5.18176	2.99264e-07	2.84301e-05	5.36926
KEGG_HUNTINGTONS_DISEASE	-0.0592328	-0.0460522	-5.15621	3.41135e-07	3.20667e-05	5.24276
KEGG_TIGHT_JUNCTION	0.0388173	-0.0269276	5.14392	3.63252e-07	3.37824e-05	5.18208
KEGG_CYSTEINE_AND_METHIONINE_METABOLISM	-0.0423159	-0.0359168	-5.13444	3.81233e-07	3.50735e-05	5.13543
KEGG_BIOSYNTHESIS_OF_UNSATURATED_FATTY_ACIDS	0.0729091	-0.0328386	5.11274	4.25729e-07	3.87414e-05	5.02884
KEGG_ARRHYTHMOGENIC_RIGHT_VENTRICULAR_CARDIOMYOPATHY_ARVC	-0.0555921	-0.0496616	-5.06048	5.54453e-07	4.99008e-05	4.7739
KEGG_MTOR_SIGNALING_PATHWAY	0.0437777	-0.0369629	5.00725	7.23906e-07	6.44276e-05	4.51672
KEGG_GLYCOSAMINOGLYCAN_BIOSYNTHESIS_CHONDROITIN_SULFATE	-0.0607071	-0.0538805	-5.00311	7.39015e-07	6.50333e-05	4.4968
KEGG_NEUROACTIVE_LIGAND_RECEPTOR_INTERACTION	0.0586486	-0.0344559	4.99217	7.80402e-07	6.7895e-05	4.44428
KEGG_SNARE_INTERACTIONS_IN_VESICULAR_TRANSPORT	-0.042502	-0.0486514	-4.94771	9.72772e-07	8.36584e-05	4.23197
KEGG_SPLICEOSOME	-0.0733303	-0.0328173	-4.92078	1.11076e-06	9.44143e-05	4.10422
KEGG_PROSTATE_CANCER	-0.0461862	-0.0395591	-4.91114	1.16459e-06	9.78252e-05	4.05865
KEGG_ALDOSTERONE_REGULATED_SODIUM_REABSORPTION	0.0613706	-0.031317	4.85856	1.50552e-06	0.000124958	3.81153
KEGG_GNRH_SIGNALING_PATHWAY	0.0433246	-0.0296073	4.78236	2.17503e-06	0.000178353	3.45779
KEGG_VALINE_LEUCINE_AND_ISOLEUCINE_BIOSYNTHESIS	-0.066415	-0.040889	-4.7768	2.2338e-06	0.000180938	3.43217
KEGG_FC_GAMMA_R_MEDIATED_PHAGOCYTOSIS	-0.0563605	-0.0360196	-4.72253	2.89345e-06	0.000231476	3.18365
KEGG_OOCYTE_MEIOSIS	-0.0439255	-0.0402062	-4.69448	3.3042e-06	0.000261032	3.05623
KEGG_CHEMOKINE_SIGNALING_PATHWAY	-0.0509332	-0.036834	-4.63902	4.28726e-06	0.000334406	2.8064
KEGG_SELENOAMINO_ACID_METABOLISM	-0.0469198	-0.0438757	-4.635	4.36861e-06	0.000336383	2.78837
KEGG_CALCIUM_SIGNALING_PATHWAY	0.0583367	-0.0443566	4.59432	5.27858e-06	0.000401172	2.60703
KEGG_FRUCTOSE_AND_MANNOSE_METABOLISM	-0.0465552	-0.0457401	-4.55407	6.35651e-06	0.000476738	2.42906
KEGG_VASOPRESSIN_REGULATED_WATER_REABSORPTION	0.0445122	-0.0388783	4.54534	6.6168e-06	0.000489643	2.39064
KEGG_PORPHYRIN_AND_CHLOROPHYLL_METABOLISM	-0.0425885	0.00133185	-4.44936	1.02404e-05	0.000747549	1.97293
KEGG_O_GLYCAN_BIOSYNTHESIS	-0.0573105	-0.0473693	-4.38781	1.34933e-05	0.000971516	1.70946
KEGG_RENIN_ANGIOTENSIN_SYSTEM	-0.0516283	-0.0148993	-4.3807	1.39271e-05	0.000988825	1.67926
KEGG_ERBB_SIGNALING_PATHWAY	0.0412597	-0.0324731	4.36624	1.48514e-05	0.0010396	1.61794
KEGG_PARKINSONS_DISEASE	-0.0711116	-0.0386342	-4.21965	2.81931e-05	0.00194532	1.00724
KEGG_TRYPTOPHAN_METABOLISM	-0.0461388	-0.0444926	-4.20399	3.0158e-05	0.00205074	0.943162
KEGG_ADIPOCYTOKINE_SIGNALING_PATHWAY	0.035943	-0.0360851	4.09665	4.75824e-05	0.00318802	0.510002
KEGG_LINOLEIC_ACID_METABOLISM	0.0389377	-0.0185486	4.09629	4.76549e-05	0.00318802	0.508558
KEGG_NITROGEN_METABOLISM	-0.0511444	-0.0386134	-4.06188	5.50391e-05	0.00357754	0.371938
KEGG_B_CELL_RECEPTOR_SIGNALING_PATHWAY	-0.0545732	-0.0386467	-4.06097	5.52471e-05	0.00357754	0.368363
KEGG_GLYCOSAMINOGLYCAN_BIOSYNTHESIS_HEPARAN_SULFATE	-0.0483398	-0.0523174	-4.02324	6.46217e-05	0.00407117	0.219851
KEGG_VIBRIO_CHOLERAE_INFECTION	-0.0371316	-0.0401836	-4.00039	7.1014e-05	0.00440287	0.130537
KEGG_VASCULAR_SMOOTH_MUSCLE_CONTRACTION	0.0367901	-0.0366131	3.97468	7.8919e-05	0.00481406	0.0306597
KEGG_CIRCADIAN_RHYTHM_MAMMAL	0.059571	-0.0310303	3.88936	0.000111563	0.00669379	-0.296463
KEGG_REGULATION_OF_AUTOPHAGY	0.0340471	0.000652983	3.74604	0.000196706	0.0116057	-0.830765
KEGG_PROXIMAL_TUBULE_BICARBONATE_RECLAMATION	0.0534023	-0.0384578	3.73267	0.000207197	0.0120174	-0.879608
KEGG_NOD_LIKE_RECEPTOR_SIGNALING_PATHWAY	-0.0493372	-0.0324037	-3.71152	0.000224882	0.0128183	-0.956565
KEGG_DRUG_METABOLISM_OTHER_ENZYMES	-0.0250927	-0.00810357	-3.46086	0.00057611	0.0322622	-1.83676
KEGG_ALPHA_LINOLENIC_ACID_METABOLISM	0.0315913	-0.0240664	3.38657	0.00075329	0.041431	-2.08627
KEGG_HEDGEHOG_SIGNALING_PATHWAY	0.0312781	-0.0354877	3.37861	0.000775	0.04185	-2.11267
KEGG_SULFUR_METABOLISM	-0.0453971	-0.0269563	-3.3534	0.000847765	0.0449315	-2.196
KEGG_ALANINE_ASPARTATE_AND_GLUTAMATE_METABOLISM	0.0353311	-0.0352221	3.32654	0.000932195	0.0484741	-2.28406
KEGG_COLORECTAL_CANCER	-0.0356154	-0.0411313	-3.32357	0.000941987	0.0484741	-2.29375
